# Supplementary material
Source: Springer Nature journal article supplement (https://www.springermedizin.de/resource/supplementary/12874_2009_419_MOESM1_ESM.pdf/9432048)

ART  
Adherence

Heavy  
Alcohol Use

CD4 Cell  
Count

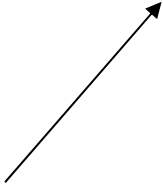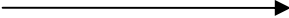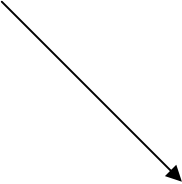

Supplement: MOESM1 [file 9432048]
